# Supplementary material for: Lab on a chip sensor for rapid detection and antibiotic resistance determination of Staphylococcus aureus
Source: Royal Society of Chemistry journal article supplement (doi:10.1039/c5an02301g), 2016-01-01
Supplement: c5an02301g1.pdf [file c5an02301g1.pdf]

## Supplementary Materials

# Lab on a Chip Sensor for Rapid Detection and Antibiotic Resistance Determination of *Staphylococcus Aureus*

Chathurika D. Abeyrathne<sup>a,b,\*</sup>, Duc H. Huynh<sup>a,b</sup>, Thomas W. McIntire<sup>c</sup>, Thanh C. Nguyen<sup>a,b</sup>,  
Babak Nasr<sup>a,b</sup>, Daniela Zantomio<sup>d</sup>, Gursharan Chana<sup>a,e</sup>, Iain Abbott<sup>f</sup>, Peter Choong<sup>g</sup>, Mike  
Catton<sup>f</sup>, Efstratios Skafidas<sup>a,b,e</sup>

<sup>a</sup>Centre for Neural Engineering, The University of Melbourne, Carlton, VIC 3053, Australia.

<sup>b</sup>Department of Electrical and Electronic Engineering, Melbourne School of Engineering, The  
University of Melbourne, Victoria, 3010, Australia.

<sup>c</sup>Melbourne Medical School, The University of Melbourne, Victoria, 3010, Australia.

<sup>d</sup>Department of Haematology, Austin Health, Victoria, 3084, Australia.

<sup>e</sup>Department of Psychiatry, Royal Melbourne Hospital, The University of Melbourne, Victoria, 3050,  
Australia.

<sup>f</sup>Victorian Infectious Diseases Reference Laboratory, Doherty Institute, Victoria, 3000, Australia.

<sup>g</sup>Department of Surgery at St. Vincent's Hospital, University of Melbourne, Victoria, 3000, Australia.

\*e-mail: [chathurika.abeyrathne@unimelb.edu.au](mailto:chathurika.abeyrathne@unimelb.edu.au)

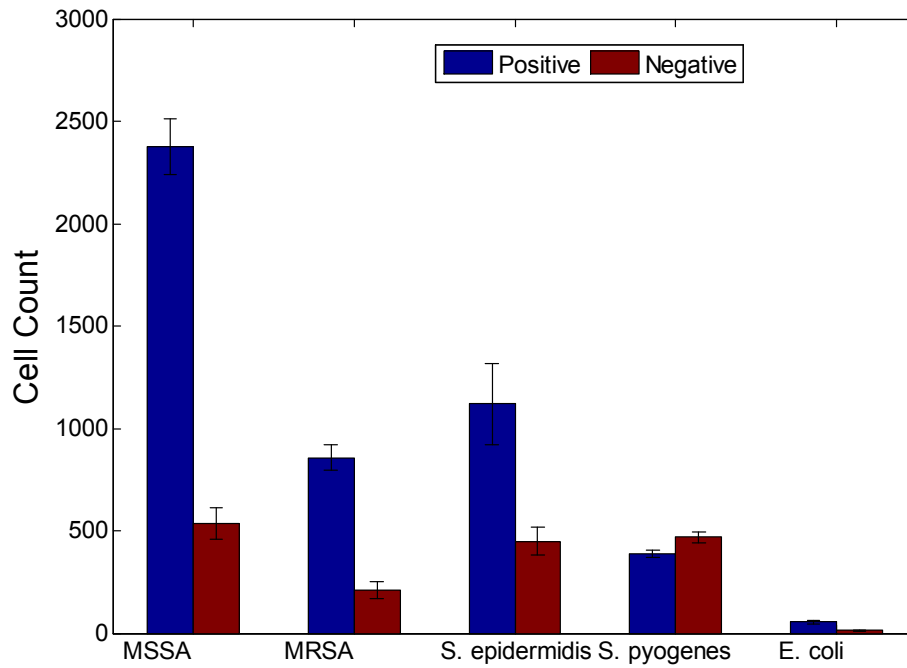

Fig. S1: Specificity of anti-*S. aureus* antibody. The negative control was not incubated with the antibody. Here, *S. aureus* (MSSA and MRSA), *S. epidermidis*, *S. pyogenes* and *E. coli* in stationary phase ( $\approx 10^9$  cells/ml) were incubated for 1 hour in both positive and negative controls. The difference in number of cells of positive and negative control gives the number of cells bound to the antibody.

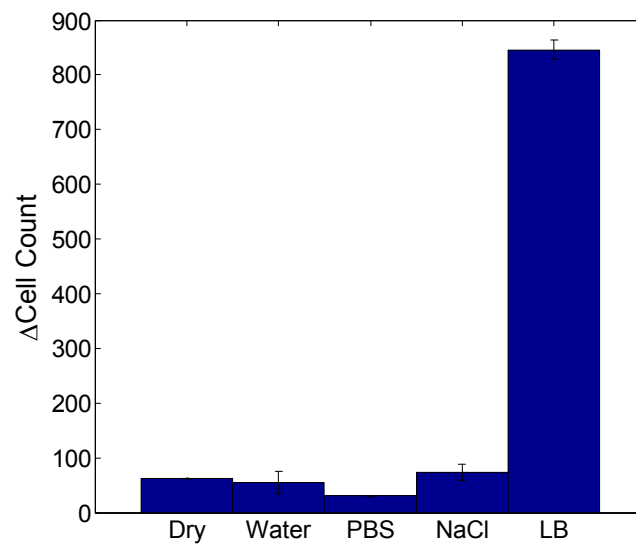

Fig. S2: Growth of *S. aureus* (MSSA) bacterial colonies in various growth media. Here, air (dry), Milli-Q water, 1X phosphate buffered saline (PBS), 1M sodium chloride (NaCl) and Luria broth (LB) were used as the growth mediums. The difference between the cell count after immobilization of *S. aureus* on glass slides and the cell count after overnight incubation gives the rate of growth of *S. aureus* in various media.

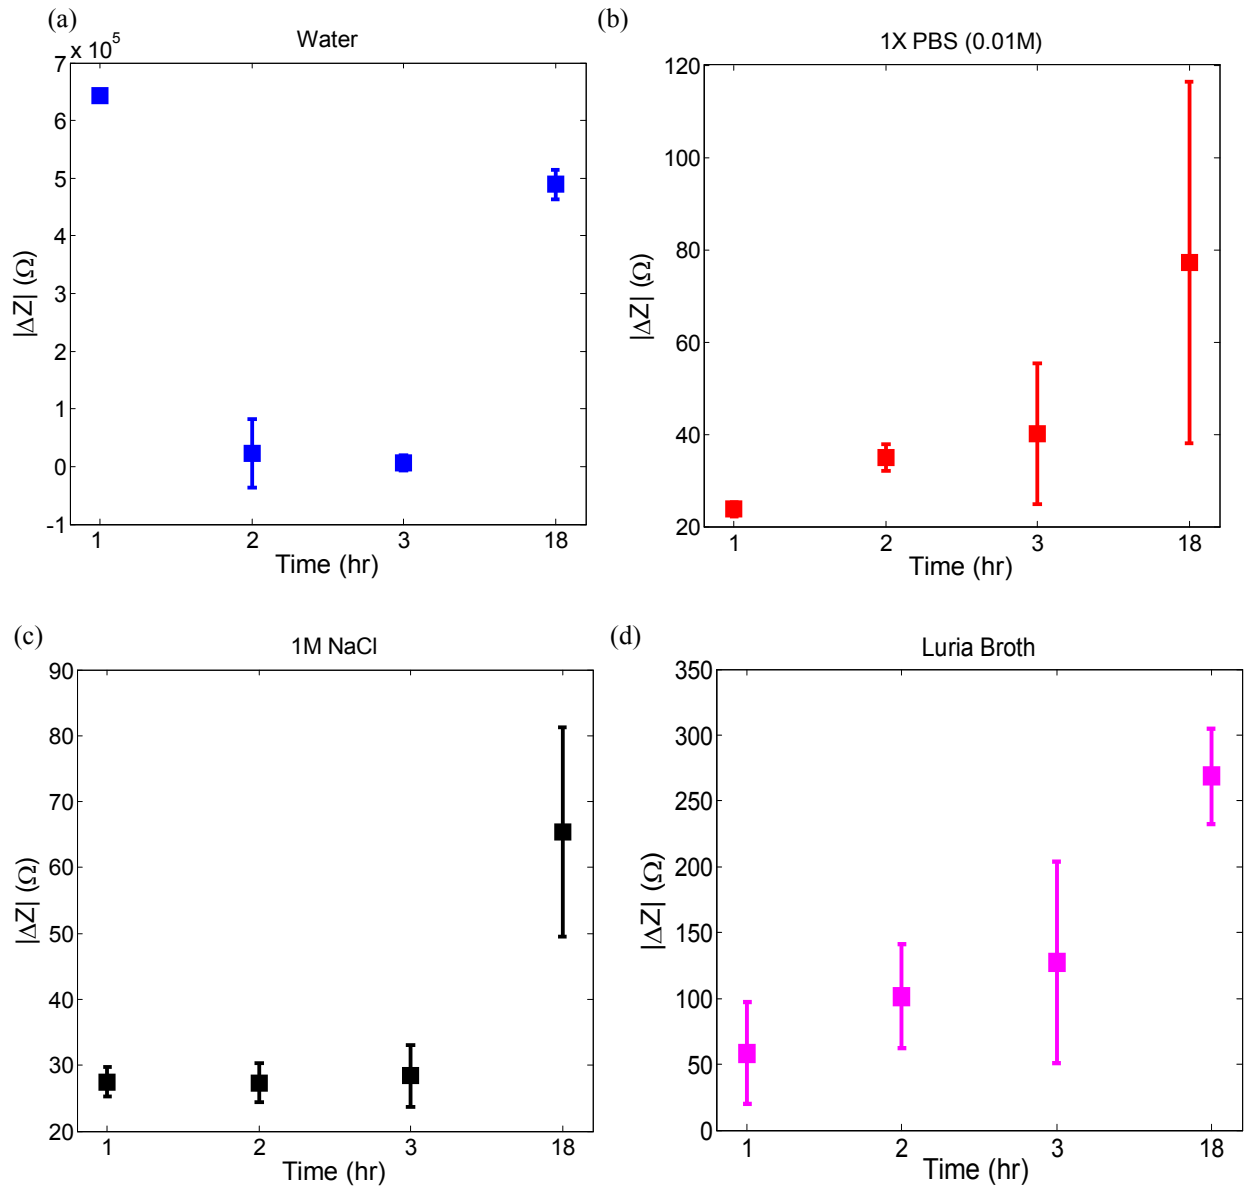

Fig. S3: Changes in impedance of the sensor due to *S. aureus* (MSSA) growth compared to the empty sensor. Here, Milli-Q water, PBS, 1M NaCl and LB were used as the growth mediums. The lock-in-amplifier measurements were performed at 100 kHz.
